# Supplementary material for: Activin B induces human endometrial cancer cell adhesion, migration and invasion by up-regulating integrin β3 via SMAD2/3 signaling
Source: PubMed Central journal article supplement (PMC4741631; doi:10.18632/oncotarget.5229), 2015-08-28
Supplement: oncotarget-06-31659-s001.pdf [file oncotarget-06-31659-s001.pdf]

# Activin B induces human endometrial cancer cell adhesion, migration and invasion by up-regulating integrin $\beta 3$ via SMAD2/3 signaling

## Supplementary Material

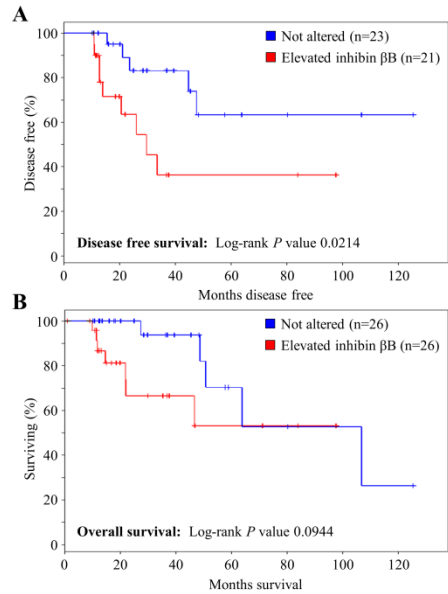

**Supplementary Figure 1.** Elevated inhibin  $\beta B$  is associated with reduced disease free survival and a trend towards reduced overall survival in serous endometrial cancers. The cBioPortal for Cancer Genomics was used to query endometrial carcinomas with serous histology from The Cancer Genome Atlas (n=53) for up-regulation of inhibin  $\beta B$  subunit mRNA above the median. Disease free (A) and overall (B) survival differences between unaltered samples and those with elevated inhibin  $\beta B$  are displayed as Kaplan-Meier survival curves with a  $P$  value from a Log-rank test.
